# Supplementary material
Source: publisher site journal article supplement (https://www.spandidos-publications.com/3093/downloadSupplementary)
Supplement: Supplementary file 1 [file downloadSupplementary]

## Sheet: Sheet1
Supplementray Table Ⅳ. Differentially expressed lncRNAs with 1.5 fold change between mid-secretory phase and proliferative phase endometrium. Sorted fold change from highly expressed in secretory phase to proliferative phase.
A, Upregulated lncRNAs
Transcript_ID	Gene_Symbol	Description	FC	FC-SD	p-value
NR_123740	RIMKLB	ribosomal modification protein rimK like family member B, transcript variant 3	30.2256	1.24909	0.00330539
NR_121625	LINC02432	long intergenic non-protein coding RNA 2432	15.5469	0.498654	1.16 x 10-4
NR_046371	CP	ceruloplasmin, transcript variant 2	15.3309	1.30714	0.00674911
NR_120480	IL6ST	interleukin 6 signal transducer, transcript variant 4	14.7984	2.08316	0.0117889
NR_110114	LOC101927668	uncharacterized LOC101927668	7.94063	1.79092	0.0165216
NR_126404	LINC01320	long intergenic non-protein coding RNA 1320	7.82291	1.10232	0.00190889
NR_045623	NABP1	nucleic acid binding protein 1, transcript variant 4	7.05118	1.61449	0.0130689
NR_131782	CCEPR	cervical carcinoma expressed PCNA regulatory lncRNA	6.4217	1.11146	0.0157946
NR_026979	DRAIC	downregulated RNA in cancer, inhibitor of cell invasion and migration	6.02525	1.07663	0.0151323
NR_045580	RXFP1	relaxin/insulin like family peptide receptor 1, transcript variant 9	5.67285	1.05777	0.00894406
NR_037840	IL15	interleukin 15, transcript variant 1	5.64804	0.840081	0.00210594
NR_038834	LINC01207	long intergenic non-protein coding RNA 1207	4.7826	0.893772	0.0102984
NR_033557	LOC100422737	uncharacterized LOC100422737	4.49418	1.20498	0.0364724
NR_033807	CYP3A5	cytochrome P450 family 3 subfamily A member 5, transcript variant 3	4.47433	0.570611	0.00296351
NR_121187	PGM5P4-AS1	PGM5P4 antisense RNA 1, transcript variant 3	4.09184	0.361582	0.00134533
NR_015431	LINC-PINT	long intergenic non-protein coding RNA, p53 induced transcript, transcript variant 1	3.65065	0.557134	9.68 x 10-4
NR_146893	ARAP2	ArfGAP with RhoGAP domain, ankyrin repeat and PH domain 2, transcript variant 3	3.45362	0.847779	0.0238893
NR_003225	LGALS3	galectin 3, transcript variant 2	3.24704	1.34871	0.0475118
NR_131917	LOC105747689	uncharacterized LOC105747689	3.21352	0.493736	7.85 x 10-4
NR_109843	SSFA2	sperm specific antigen 2, transcript variant 6	3.0509	0.925224	0.0256358
NR_051969	MRPS2	mitochondrial ribosomal protein S2, transcript variant 4	2.92471	0.948333	0.0429536
NR_131224	H19	H19, imprinted maternally expressed transcript (non-protein coding), transcript variant 3	2.92388	0.874567	0.0150136
NR_130747	CHRD	chordin, transcript variant 5	2.82978	0.741184	0.00744933
NR_002196	H19	H19, imprinted maternally expressed transcript (non-protein coding), transcript variant 1	2.79588	0.876681	0.0268911
NR_028502	MIR22HG	MIR22 host gene, transcript variant 1	2.75036	0.586006	0.00727688
NR_134650	LOC100506885	uncharacterized LOC100506885, transcript variant 2	2.73475	0.471859	0.00238631
NR_131223	H19	H19, imprinted maternally expressed transcript (non-protein coding), transcript variant 2	2.6927	1.00088	0.0394008
NR_073070	TMEM165	transmembrane protein 165, transcript variant 2	2.68025	0.866617	0.0342738
NR_033931	LINC01085	long intergenic non-protein coding RNA 1085	2.65196	0.804761	0.031385
NR_048564	IL1R2	interleukin 1 receptor type 2, transcript variant 2	2.59613	0.483383	0.00793728
NR_125896	LINC02268	long intergenic non-protein coding RNA 2268	2.51978	0.439707	0.00113567
NR_125349	CD55	CD55 molecule (Cromer blood group), transcript variant 8	2.49509	0.792878	0.0441767
NR_024349	LOC284023	uncharacterized LOC284023	2.43776	0.388179	5.74 x 10-4
NR_037174	PSMB8-AS1	PSMB8 antisense RNA 1 (head to head), transcript variant 2	2.41394	0.754671	0.0210786
NR_024065	LINC00312	long intergenic non-protein coding RNA 312	2.41203	0.484517	0.0053219
NR_136199	HAND2-AS1	HAND2 antisense RNA 1 (head to head), transcript variant 9	2.38129	0.719671	0.0362925
NR_109851	LINC-PINT	long intergenic non-protein coding RNA, p53 induced transcript, transcript variant 4	2.36839	0.383555	6.69 x 10-4
NR_015422	LINC01341	long intergenic non-protein coding RNA 1341	2.27427	0.556014	0.0118965
NR_121185	PGM5P4-AS1	PGM5P4 antisense RNA 1, transcript variant 1	2.26338	0.444367	0.00918875
NR_026665	CD58	CD58 molecule, transcript variant 3	2.23554	0.360951	0.0023071
NR_033852	LOC283177	uncharacterized LOC283177	2.22802	0.537153	0.0171158
NR_135746	NIPAL2	NIPA like domain containing 2, transcript variant 5	2.22684	0.650187	0.0251165
NR_133662	KCNK4-TEX40	KCNK4-TEX40 readthrough	2.19461	0.426283	0.0110119
NR_028500	LDHA	lactate dehydrogenase A, transcript variant 6	2.17027	0.441076	0.0047627
NR_146781	DAPK1-IT1	DAPK1 intronic transcript 1	2.09438	0.611231	0.0337572
NR_028504	MIR22HG	MIR22 host gene, transcript variant 3	2.07754	0.269143	0.000887277
NR_024625	API5	apoptosis inhibitor 5, transcript variant 4	2.07658	0.806468	0.0406288
NR_024505	LINC00598	long intergenic non-protein coding RNA 598, transcript variant TTL-T	2.07355	0.348923	0.00198199
NR_026775	LINC00240	long intergenic non-protein coding RNA 240	2.07179	0.262712	0.00124583
NR_125356	PTBP2	polypyrimidine tract binding protein 2, transcript variant 9	1.98355	0.683001	0.0472486
NR_130735	WASIR2	WASH and IL9R antisense RNA 2	1.98008	0.417252	0.00325328
NR_146861	C6orf141	chromosome 6 open reading frame 141, transcript variant 10	1.97666	0.647545	0.04691
NR_045581	RXFP1	relaxin/insulin like family peptide receptor 1, transcript variant 10	1.95794	0.739944	0.0465287
NR_002229	RPL23AP32	ribosomal protein L23a pseudogene 32	1.95324	0.560925	0.0181074
NR_026955	LINC00284	long intergenic non-protein coding RNA 284	1.94918	0.46439	0.00616001
NR_003573	ANXA2P2	annexin A2 pseudogene 2	1.94154	0.486657	0.0112059
NR_104029	DGUOK-AS1	DGUOK antisense RNA 1, transcript variant 1	1.93248	0.629312	0.0279002
NR_030761	TMED5	transmembrane p24 trafficking protein 5, transcript variant 3	1.92652	0.72818	0.0434
NR_045530	SOAT1	sterol O-acyltransferase 1, transcript variant 4	1.92348	0.328218	0.00141421
NR_040017	RNF157-AS1	RNF157 antisense RNA 1	1.90914	0.546039	0.0276785
NR_046344	CALHM2	calcium homeostasis modulator 2, transcript variant 3	1.90574	0.434962	0.0054194
NR_145477	RIOK3	RIO kinase 3, transcript variant 3	1.89979	0.39351	0.0110881
NR_121613	LINC00472	long intergenic non-protein coding RNA 472, transcript variant 3	1.89435	0.640316	0.0359792
NR_024552	CALHM2	calcium homeostasis modulator 2, transcript variant 2	1.8691	0.619959	0.0455736
NR_024247	MUM1	melanoma associated antigen (mutated) 1, transcript variant 2	1.86857	0.707611	0.0471947
NR_048545	MGST1	microsomal glutathione S-transferase 1, transcript variant 7	1.86491	0.590654	0.0295345
NR_110415	LOC101927178	uncharacterized LOC101927178	1.85803	0.403929	0.00705867
NR_027405	MTHFD2	methylenetetrahydrofolate dehydrogenase (NADP+ dependent) 2, methenyltetrahydrofolate cyclohydrolase, transcript variant 3	1.8528	0.499845	0.023122
NR_146859	C6orf141	chromosome 6 open reading frame 141, transcript variant 8	1.85251	0.566276	0.0384744
NR_034033	LINC00996	long intergenic non-protein coding RNA 996	1.83428	0.564702	0.0297822
NR_028045	KLRA1P	killer cell lectin like receptor A1, pseudogene	1.80582	0.463846	0.0285061
NR_003679	HAND2-AS1	HAND2 antisense RNA 1 (head to head), transcript variant 1	1.80216	0.389808	0.00623427
NR_033738	LOC440300	chondroitin sulfate proteoglycan 4 pseudogene	1.79308	0.462937	0.0317561
NR_134466	CARD19	caspase recruitment domain family member 19, transcript variant 6	1.79003	0.30471	0.00445637
NR_146419	ANKRD20A4-ANKRD20A20P	ANKRD20A4-ANKRD20A20P readthrough	1.78188	0.610541	0.0457471
NR_110156	LINC01798	long intergenic non-protein coding RNA 1798	1.78151	0.650215	0.0436411
NR_046361	FAM49B	family with sequence similarity 49 member B, transcript variant 5	1.77736	0.641998	0.0420944
NR_040085	TRG-AS1	T-cell receptor gamma locus antisense RNA 1	1.72095	0.494174	0.0194432
NR_146463	PAQR3	progestin and adipoQ receptor family member 3, transcript variant 5	1.71869	0.361934	0.0116271
NR_136696	GLYR1	glyoxylate reductase 1 homolog, transcript variant 7	1.69555	0.438333	0.0347414
NR_073470	SUPT4H1	SPT4 homolog, DSIF elongation factor subunit, transcript variant 2	1.69251	0.40757	0.0122813
NR_034120	LINC-PINT	long intergenic non-protein coding RNA, p53 induced transcript, transcript variant 9	1.6904	0.558268	0.045548
NR_103509	PHYKPL	5-phosphohydroxy-L-lysine phospho-lyase, transcript variant 4	1.68864	0.543974	0.0361369
NR_033248	GCSHP3	glycine cleavage system protein H pseudogene 3	1.68516	0.401198	0.00972901
NR_027855	CLK1	CDC like kinase 1, transcript variant 3	1.66397	0.364026	0.0204557
NR_040033	LINC01915	long intergenic non-protein coding RNA 1915	1.65837	0.261445	0.00621634
NR_036485	SBF2-AS1	SBF2 antisense RNA 1	1.65669	0.443799	0.023061
NR_046438	MEIS1-AS3	MEIS1 antisense RNA 3	1.64275	0.292102	0.0123154
NR_015407	LINC01139	long intergenic non-protein coding RNA 1139	1.63598	0.466089	0.0366866
NR_038877	C8orf34-AS1	C8orf34 antisense RNA 1	1.62639	0.386034	0.0142229
NR_039985	FLJ22447	uncharacterized LOC400221	1.62276	0.181819	9.37 x 10-4
NR_027112	LINC02112	long intergenic non-protein coding RNA 2112	1.61924	0.177185	0.00349728
NR_136734	RNF217	ring finger protein 217, transcript variant 4	1.61533	0.469566	0.0327292
NR_126423	SAPCD1-AS1	SAPCD1 antisense RNA 1	1.61037	0.422501	0.0252182
NR_126336	LINC01909	long intergenic non-protein coding RNA 1909	1.60121	0.317153	0.00529711
NR_146467	SPINT1-AS1	SPINT1 antisense RNA 1, transcript variant 2	1.59354	0.365133	0.0113679
NR_132419	COX20	COX20, cytochrome c oxidase assembly factor, transcript variant 6	1.58798	0.429318	0.0224012
NR_026876	RNF217-AS1	RNF217 antisense RNA 1 (head to head)	1.5846	0.256584	0.00504678
NR_108066	LOC101927181	uncharacterized LOC101927181	1.57809	0.224999	0.00217448
NR_137438	BABAM2	BRISC and BRCA1 A complex member 2, transcript variant 12	1.57244	0.265508	0.00414518
NR_135508	SNRPA1	small nuclear ribonucleoprotein polypeptide A', transcript variant 4	1.55257	0.364846	0.0327708
NR_136705	KLF8	Kruppel like factor 8, transcript variant 7	1.54581	0.375183	0.0299061
NR_033242	PET100	PET100 homolog, transcript variant 2	1.54496	0.490666	0.0493893
NR_037573	DCTN5	dynactin subunit 5, transcript variant 3	1.53997	0.464121	0.0480947
NR_104643	FLJ32255	uncharacterized LOC643977	1.52501	0.290356	0.00908504
NR_111987	NPHP4	nephrocystin 4, transcript variant 4	1.52414	0.386681	0.0401829
NR_045720	MAN1B1	mannosidase alpha class 1B member 1, transcript variant 2	1.52304	0.439374	0.0441543
NR_015359	WDFY3-AS2	WDFY3 antisense RNA 2	1.5204	0.286648	0.00566907
NR_146297	LNCSRLR	lncRNA sorafenib resistance in renal cell carcinoma associated	1.51535	0.18366	6.65 x 10-4
NR_037148	DNAJC25	DnaJ heat shock protein family (Hsp40) member C25, transcript variant 2	1.51155	0.363148	0.0290846
NR_138551	PLAC9	placenta specific 9, transcript variant 3	1.51005	0.303293	0.0096844
NR_037627	LOC100288570	glycosylphosphatidylinositol anchor attachment protein 1 homolog (yeast) pseudogene	1.50438	0.412746	0.0419855
B, Downregulated lncRNAs
Transcript_ID	Gene_Symbol	Description	FC	FC-SD	p-value
NR_033998	LOC729970	hCG2028352-like	-1.50052	0.172075	4.97 x 10-4
NR_024079	LINC00471	long intergenic non-protein coding RNA 471	-1.50077	0.375714	0.0284298
NR_027387	LINC01003	long intergenic non-protein coding RNA 1003	-1.50671	0.440156	0.0409368
NR_037595	HHIP-AS1	HHIP antisense RNA 1	-1.50779	0.249731	0.00322026
NR_002985	SNORA58	small nucleolar RNA, H/ACA box 58	-1.50972	0.438983	0.0450684
NR_126330	LINC01572	long intergenic non-protein coding RNA 1572	-1.51105	0.28415	0.00676717
NR_131157	NKILA	NF-kappaB interacting lncRNA	-1.51159	0.303086	0.0148488
NR_121577	NALT1	NOTCH1 associated lncRNA in T-cell acute lymphoblastic leukemia 1	-1.51927	0.246948	0.00488273
NR_038859	LINC00311	long intergenic non-protein coding RNA 311	-1.52614	0.398664	0.0224811
NR_040091	LOC100506990	uncharacterized LOC100506990, transcript variant 1	-1.52683	0.371178	0.0166565
NR_003098	SNHG1	small nucleolar RNA host gene 1	-1.53019	0.365831	0.0205782
NR_038258	TPTE2P5	transmembrane phosphoinositide 3-phosphatase and tensin homolog 2 pseudogene 5, transcript variant 1	-1.53595	0.327969	0.00934313
NR_024408	PSMD5-AS1	PSMD5 antisense RNA 1 (head to head)	-1.53809	0.2773	0.00539705
NR_003370	RRN3P1	RRN3 homolog, RNA polymerase I transcription factor pseudogene 1	-1.53895	0.285001	0.00588707
NR_036505	LOC100128361	uncharacterized LOC100128361	-1.54231	0.369811	0.0315193
NR_146174	ZFYVE16	zinc finger FYVE-type containing 16, transcript variant 8	-1.54474	0.398135	0.0199203
NR_023380	CCDC144CP	coiled-coil domain containing 144C, pseudogene	-1.54507	0.3479	0.011272
NR_029435	PSMA3-AS1	PSMA3 antisense RNA 1, transcript variant 2	-1.55328	0.35646	0.0119783
NR_130940	PMS2P7	PMS1 homolog 2, mismatch repair system component pseudogene 7	-1.58257	0.43267	0.0282197
NR_126342	LOC171391	uncharacterized LOC171391, transcript variant 2	-1.58823	0.356453	0.0175381
NR_134930	LOC101928464	uncharacterized LOC101928464, transcript variant 4	-1.58855	0.311789	0.00575394
NR_135479	LINC02001	long intergenic non-protein coding RNA 2001	-1.59105	0.32459	0.00813421
NR_002941	PDCL3P4	phosducin-like 3 pseudogene 4	-1.59332	0.456598	0.0276354
NR_026991	H1FX-AS1	H1FX antisense RNA 1	-1.59434	0.401321	0.0158085
NR_037660	POC1B	POC1 centriolar protein B, transcript variant 4	-1.59532	0.477652	0.0347908
NR_027425	FAM66D	family with sequence similarity 66 member D	-1.6035	0.453884	0.0239558
NR_038253	LOC100288637	OTU deubiquitinase 7A pseudogene, transcript variant 1	-1.60668	0.25902	0.00237673
NR_073516	SPATA33	spermatogenesis associated 33, transcript variant 7	-1.61085	0.403573	0.0147842
NR_104593	CENPU	centromere protein U, transcript variant 2	-1.61138	0.242789	0.00200019
NR_037709	TEN1-CDK3	TEN1-CDK3 readthrough (NMD candidate)	-1.61151	0.315952	0.0101683
NR_103767	LINC01311	long intergenic non-protein coding RNA 1311	-1.61253	0.423478	0.0280558
NR_146322	LINC02246	long intergenic non-protein coding RNA 2246	-1.61965	0.320589	0.0163224
NR_126338	AZIN1-AS1	AZIN1 antisense RNA 1, transcript variant 1	-1.62264	0.3868	0.0237903
NR_038926	PRKAG2-AS1	PRKAG2 antisense RNA 1	-1.62524	0.475681	0.0270457
NR_003561	DPY19L2P2	DPY19L2 pseudogene 2, transcript variant 2	-1.62612	0.388424	0.0115966
NR_045027	LRRC75A-AS1	LRRC75A antisense RNA 1, transcript variant 30	-1.62808	0.536875	0.0397997
NR_027992	NBEAP1	neurobeachin pseudogene 1	-1.62867	0.377273	0.0293688
NR_026758	FAR2P1	fatty acyl-CoA reductase 2 pseudogene 1	-1.63253	0.466719	0.0235515
NR_033322	NSUN5P1	NOP2/Sun RNA methyltransferase family member 5 pseudogene 1, transcript variant 2	-1.63404	0.246402	0.0019971
NR_134476	LOC101929165	uncharacterized LOC101929165, long non-coding RNA	-1.63624	0.382968	0.00997555
NR_045861	ARMCX4	armadillo repeat containing, X-linked 4, transcript variant 4	-1.64277	0.309157	0.0137831
NR_038344	MAGI2-AS3	MAGI2 antisense RNA 3, transcript variant 2	-1.64493	0.427875	0.0203261
NR_034082	LOC100130950	uncharacterized LOC100130950	-1.64503	0.227219	0.00334516
NR_036536	SNHG4	small nucleolar RNA host gene 4, transcript variant 2	-1.653	0.243094	0.00107437
NR_109849	LOC102606465	uncharacterized LOC102606465	-1.65825	0.358879	0.00816779
NR_038343	MAGI2-AS3	MAGI2 antisense RNA 3, transcript variant 1	-1.66592	0.270818	0.00223495
NR_144516	LOC100996724	phosphodiesterase 4D interacting protein-like, transcript variant 1	-1.67012	0.298811	0.00326573
NR_120647	LINC01515	long intergenic non-protein coding RNA 1515	-1.67462	0.34064	0.00474504
NR_038938	RPARP-AS1	RPARP antisense RNA 1, transcript variant 2	-1.6759	0.478042	0.0238224
NR_024403	LOC730101	uncharacterized LOC730101, transcript variant 1	-1.67872	0.470918	0.0219738
NR_026788	FAM66C	family with sequence similarity 66 member C	-1.68275	0.530292	0.0298909
NR_022008	PWAR5	Prader Willi/Angelman region RNA 5	-1.69772	0.46362	0.0265575
NR_132337	DANT2	DXZ4 associated non-coding transcript 2, distal, transcript variant 2	-1.69851	0.540747	0.0302514
NR_027157	TMPO-AS1	TMPO antisense RNA 1	-1.69896	0.337503	0.0146098
NR_038382	LINC00865	long intergenic non-protein coding RNA 865	-1.71457	0.441233	0.0209904
NR_046451	LOC374443	C-type lectin domain family 2 member D pseudogene, transcript variant 9	-1.7172	0.31888	0.00277047
NR_109982	TARID	TCF21 antisense RNA inducing promoter demethylation	-1.72381	0.407026	0.00924043
NR_046273	LOC729683	uncharacterized LOC729683	-1.72403	0.347408	0.00423642
NR_110918	LINC02126	long intergenic non-protein coding RNA 2126	-1.73664	0.48388	0.0188676
NR_001459	SNHG10	small nucleolar RNA host gene 10, transcript variant 2	-1.74676	0.552339	0.0486425
NR_110139	LOC101929718	uncharacterized LOC101929718	-1.7496	0.354203	0.00934305
NR_024031	DANCR	differentiation antagonizing non-protein coding RNA, transcript variant 1	-1.75615	0.303235	0.00249602
NR_026913	LOC100133669	uncharacterized LOC100133669	-1.76125	0.378485	0.00988419
NR_144414	STX18	syntaxin 18, transcript variant 5	-1.76136	0.372681	0.00740836
NR_073102	ZNF551	zinc finger protein 551, transcript variant 3	-1.76857	0.529272	0.0461864
NR_146076	USP32P3	ubiquitin specific peptidase 32 pseudogene 3	-1.77044	0.308392	0.00280715
NR_027700	NOP56	NOP56 ribonucleoprotein, transcript variant 2	-1.77158	0.564083	0.032251
NR_045525	ZNF724	zinc finger protein 724	-1.78807	0.235963	0.00239633
NR_003584	SNHG8	small nucleolar RNA host gene 8, transcript variant 1	-1.78878	0.5377	0.0217008
NR_003365	SUGT1P3	SGT1 homolog, MIS12 kinetochore complex assembly cochaperone pseudogene 3	-1.80322	0.466849	0.0117019
NR_040050	LOC100507351	uncharacterized LOC100507351	-1.80691	0.359945	0.00394623
NR_038975	MIR181A2HG	MIR181A2 host gene	-1.81395	0.323572	0.00746821
NR_146294	POC1B-AS1	POC1B antisense RNA 1	-1.82362	0.543681	0.0203154
NR_104002	DMGDH	dimethylglycine dehydrogenase, transcript variant 2	-1.82423	0.210883	0.00151118
NR_046346	GDAP1	ganglioside induced differentiation associated protein 1, transcript variant 3	-1.82961	0.455322	0.0108297
NR_024163	CKS1B	CDC28 protein kinase regulatory subunit 1B, transcript variant 2	-1.83189	0.708207	0.0488897
NR_132114	SNHG19	small nucleolar RNA host gene 19	-1.83411	0.355582	0.00304442
NR_126432	APOPT1	apoptogenic 1, mitochondrial, transcript variant 5	-1.83563	0.61663	0.0436911
NR_003141	SNHG4	small nucleolar RNA host gene 4, transcript variant 1	-1.85099	0.454992	0.0186156
NR_134984	PABPC1L	poly(A) binding protein cytoplasmic 1 like, transcript variant 6	-1.85213	0.422267	0.00633408
NR_040013	LOC644554	uncharacterized LOC644554	-1.85247	0.29949	0.00662789
NR_026857	BAIAP2-AS1	BAIAP2 antisense RNA 1 (head to head)	-1.85455	0.148959	2.85 x 10-5
NR_121649	LINC01391	long intergenic non-protein coding RNA 1391	-1.85732	0.575957	0.0412633
NR_027182	JMJD1C-AS1	JMJD1C antisense RNA 1	-1.87424	0.352573	0.00228202
NR_120386	LINC01521	long intergenic non-protein coding RNA 1521	-1.87589	0.216275	2.77 x 10-4
NR_027285	FLVCR1-AS1	FLVCR1 antisense RNA 1 (head to head), transcript variant 1	-1.88724	0.607099	0.0254802
NR_024398	ZBED3-AS1	ZBED3 antisense RNA 1	-1.88853	0.397443	0.00985465
NR_027337	HIST2H2BA	H2B histone pseudogene 1, transcript variant 1	-1.88922	0.463419	0.0098955
NR_121674	ERICH6-AS1	ERICH6 antisense RNA 1, transcript variant 1	-1.92912	0.598522	0.0260377
NR_037718	EFEMP2	EGF containing fibulin like extracellular matrix protein 2, transcript variant 2	-1.93532	0.454413	0.00574431
NR_038279	LINC00665	long intergenic non-protein coding RNA 665, transcript variant 2	-1.95528	0.777958	0.047386
NR_027481	ZNF876P	zinc finger protein 876, pseudogene	-1.95677	0.142298	2.48 x 10-5
NR_126434	STX18-IT1	STX18 intronic transcript 1	-1.98705	0.682398	0.0306103
NR_015410	CASC15	cancer susceptibility 15	-2.01034	0.690061	0.0274776
NR_036503	PRKCQ-AS1	PRKCQ antisense RNA 1, transcript variant 2	-2.01617	0.662423	0.0261861
NR_033857	BMS1P21	BMS1, ribosome biogenesis factor pseudogene 21	-2.04362	0.459908	0.00730886
NR_135583	COA1	cytochrome c oxidase assembly factor 1 homolog, transcript variant 15	-2.10364	0.518819	0.00688009
NR_046809	PLCB1-IT1	PLCB1 intronic transcript 1	-2.10828	0.370319	0.00139525
NR_119377	DLGAP1-AS2	DLGAP1 antisense RNA 2	-2.11499	0.595336	0.0118626
NR_026978	HAUS1	HAUS augmin like complex subunit 1, transcript variant 2	-2.11521	0.593169	0.0314314
NR_037669	GGCT	gamma-glutamylcyclotransferase, transcript variant 5	-2.14159	0.758609	0.0491321
NR_144325	DHX29	DExH-box helicase 29, transcript variant 6	-2.14876	0.297971	8.47 x 10-4
NR_027001	GOLGA2P7	golgin A2 pseudogene 7	-2.15102	0.238959	1.31 x 10-4
NR_004847_dup1	UBE2Q2P2	ubiquitin conjugating enzyme E2 Q2 pseudogene 2	-2.1578	0.467653	0.00529814
NR_045147	ITGB3BP	integrin subunit beta 3 binding protein, transcript variant 3	-2.16595	0.648068	0.0238913
NR_134508	TMEM26	transmembrane protein 26, transcript variant 3	-2.17689	0.717129	0.0432638
NR_024391	MIR924HG	MIR924 host gene	-2.20918	0.562856	0.0178756
NR_004847	UBE2Q2P2	ubiquitin conjugating enzyme E2 Q2 pseudogene 2	-2.21756	0.501795	0.00492804
NR_027159	LRRC75A-AS1	LRRC75A antisense RNA 1, transcript variant 3	-2.23235	0.824774	0.0404711
NR_045058	UBTF	upstream binding transcription factor, RNA polymerase I, transcript variant 4	-2.23766	0.879567	0.040753
NR_049748_dup1	LOC642423	golgin A2 pseudogene	-2.25018	0.279603	2.11 x 10-4
NR_104247	SLC2A11	solute carrier family 2 member 11, transcript variant 5	-2.27812	0.611827	0.00827456
NR_027676	BRCA1	BRCA1, DNA repair associated, transcript variant 6	-2.41638	0.636664	0.0249318
NR_036502	PRKCQ-AS1	PRKCQ antisense RNA 1, transcript variant 1	-2.45453	0.462973	0.00267636
NR_073080	PHLDA3	pleckstrin homology like domain family A member 3, transcript variant 2	-2.47154	0.900222	0.031166
NR_023921	DHRS4-AS1	DHRS4 antisense RNA 1, transcript variant 1	-2.47767	0.559688	0.00529383
NR_136188	VWC2	von Willebrand factor C domain containing 2	-2.48508	0.727467	0.0244888
NR_047662	LOC729732	uncharacterized LOC729732	-2.49663	0.392633	0.0011145
NR_132422	LOC105370333	uncharacterized LOC105370333	-2.49786	0.237909	3.51 x 10-5
NR_104225	SH3YL1	SH3 and SYLF domain containing 1, transcript variant 7	-2.50985	0.794848	0.0319398
NR_046462	FAM169A	family with sequence similarity 169 member A, transcript variant 2	-2.56691	0.349739	0.00411557
NR_045697	PRICKLE2-AS1	PRICKLE2 antisense RNA 1	-2.56743	1.08086	0.0457623
NR_038278	LINC00665	long intergenic non-protein coding RNA 665, transcript variant 1	-2.57702	0.36953	0.0010433
NR_026646	PWRN1	Prader-Willi region non-protein coding RNA 1	-2.60321	0.791784	0.0395577
NR_045211	GGTA1P	glycoprotein, alpha-galactosyltransferase 1 pseudogene, transcript variant 2	-2.89606	1.11521	0.034233
NR_015448	DLX6-AS1	DLX6 antisense RNA 1	-3.01474	0.52085	8.93 x 10-4
NR_039982	LINC00639	long intergenic non-protein coding RNA 639	-3.12855	0.645741	0.00235609
NR_120409	PCSK5	proprotein convertase subtilisin/kexin type 5, transcript variant 3	-3.84894	1.17857	0.0202218
NR_072997	PTK7	protein tyrosine kinase 7 (inactive), transcript variant 7	-4.0389	1.15636	0.0234081
NR_027349	MIR17HG	miR-17-92a-1 cluster host gene, transcript variant 2	-4.31542	0.954475	0.0108272
NR_120454	LINC02449	long intergenic non-protein coding RNA 2449, transcript variant 1	-4.50532	0.495846	0.00299934
NR_038861	TUNAR	TCL1 upstream neural differentiation-associated RNA, transcript variant 2	-4.83393	1.28381	0.0291305
NR_121610	BMPR1B-AS1	BMPR1B antisense RNA 1 (head to head)	-6.04799	0.507788	0.00156282
NR_002813	KCNIP4-IT1	KCNIP4 intronic transcript 1	-6.8875	1.44254	0.00984158
NR_133013	MMP11	matrix metallopeptidase 11, transcript variant 2	-7.94961	1.36981	0.016605
